# Supplementary material
Source: Springer Nature journal article supplement (https://www.springermedizin.de/resource/supplementary/12884_2013_1301_MOESM5_ESM.pdf/9459368)

● Eastern India

■ Makwanpur (Nepal)

▲ Bangladesh

◆ Dhanusha (Nepal)

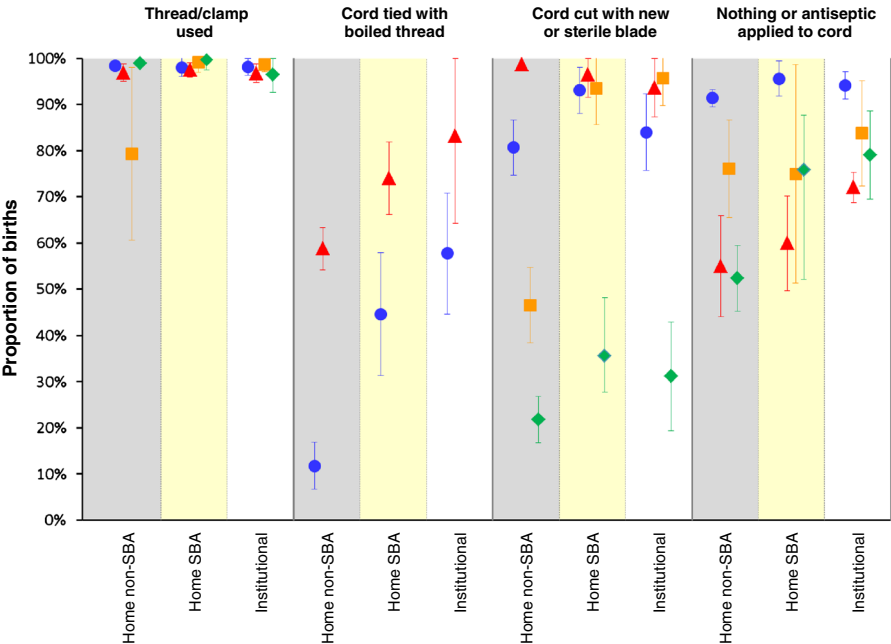

Supplement: MOESM5 [file 9459368]
